# Supplementary figures and images for: Patient-derived xenograft models of Fanconi anemia–associated head and neck cancer identify personalized therapeutic strategies
Source: JCI journal article supplement (doi:10.1172/jci195334), 2025-12-16

Supplemental Figure 1

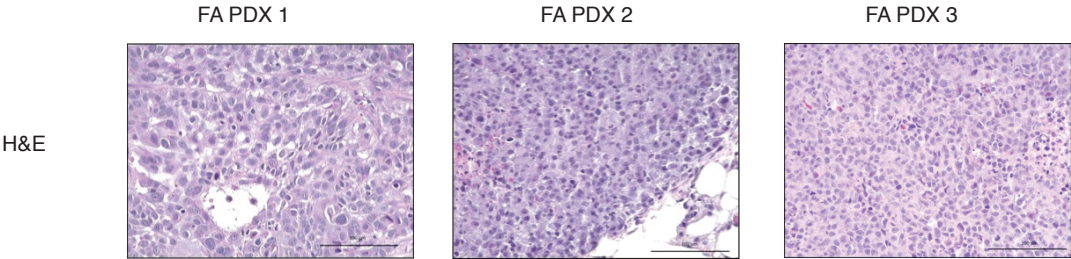

Supplement: sd3 [file 3]

Supplemental Figure 3

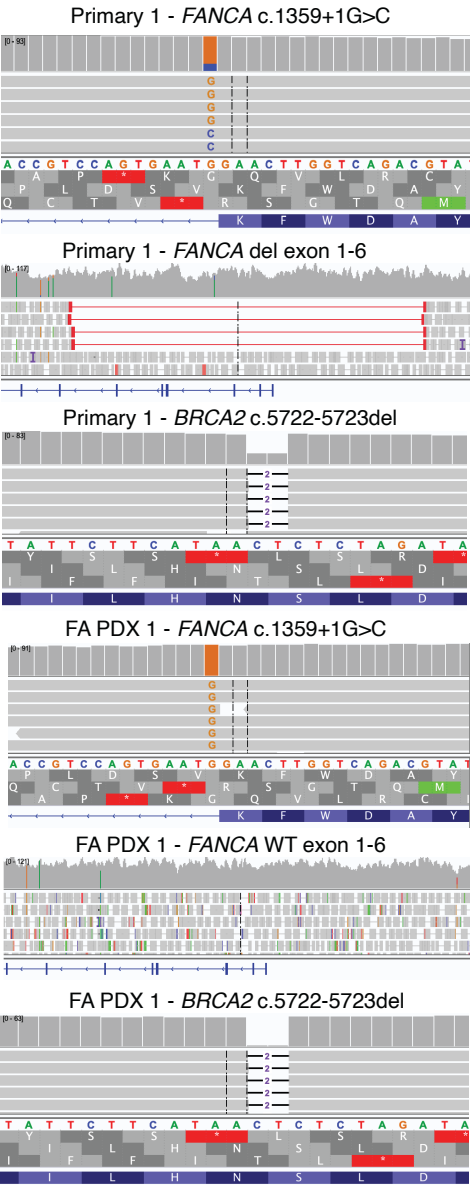

Supplement: sd5 [file 5]
